# Supplementary material
Source: ML conference proceedings conference paper supplement (https://proceedings.neurips.cc/paper_files/paper/2022/hash/3baf4eeffad860ca9c54aeab632716b4-Abstract.html)
Supplement: Supplementary file 1 [file 3baf4eeffad860ca9c54aeab632716b4-Supplemental-Conference.pdf]

## A Proofs

### A.1 Proof of Thm. 1

We will assume without loss of generality that the condition  $\inf_{\delta \in (0,1)} \left| \frac{\sigma(\delta) + \sigma(-\delta)}{\delta} \right| \geq \alpha$  stated in the theorem holds without an absolute value, namely

$$\inf_{\delta \in (0,1)} \frac{\sigma(\delta) + \sigma(-\delta)}{\delta} \geq \alpha. \quad (2)$$

To see why, note that if  $\inf_{\delta \in (0,1)} \left| \frac{\sigma(\delta) + \sigma(-\delta)}{\delta} \right| \geq \alpha \geq 0$ , then  $\frac{\sigma(\delta) + \sigma(-\delta)}{\delta}$  can never change sign as a function of  $\delta$  (otherwise it will be 0 for some  $\delta$ ). Hence, the condition implies that either  $\frac{\sigma(\delta) + \sigma(-\delta)}{\delta} \geq \alpha$  for all  $\delta \in (0, 1)$ , or that  $-\frac{\sigma(\delta) + \sigma(-\delta)}{\delta} \geq \alpha$  for all  $\delta \in (0, 1)$ . We simply choose to treat the first case, as the second case can be treated with a completely identical analysis, only flipping some of the signs.

Fix some sufficiently large dimension  $d$  and integer  $m \leq d$  to be chosen later. Choose  $\mathbf{x}_1, \dots, \mathbf{x}_m$  to be some  $m$  orthogonal vectors of norm  $b_x$  in  $\mathbb{R}^d$ . Let  $X$  be the  $d \times m$  matrix whose  $i$ -th column is  $\mathbf{x}_i$ . Given this input set, it is enough to show that there is some number  $s$ , such that for any  $\mathbf{y} \in \{0, 1\}^m$ , we can find a predictor (namely,  $\mathbf{u}, W$  depending on  $\mathbf{y}$ ) in our class, such that  $\|\mathbf{u}\| \leq b$ ,  $\|W\| \leq B$ , and

$$\forall i, \mathbf{u}^\top \sigma(W \mathbf{x}_i) \text{ is } \begin{cases} \leq s - \epsilon & y_i = 0 \\ \geq s + \epsilon & y_i = 1 \end{cases}. \quad (3)$$

We will do so as follows: We let

$$\mathbf{u} = \frac{b}{\sqrt{n}} \mathbf{1} \quad \text{and} \quad W = \frac{\delta}{b_x^2} V \text{diag}(\mathbf{y}) X^\top,$$

Where  $\delta \in (0, 1)$  is a certain scaling factor and  $V$  is a  $\pm 1$ -valued matrix of size  $n \times m$ , both to be chosen later. In particular, we will assume that  $V$  is approximately balanced, in the sense that for any column  $i \in [m]$  of  $V$ , if  $p_i$  is the portion of  $+1$  entries in the column, then

$$\max_i \left| \frac{1}{2} - p_i \right| \leq \frac{\alpha}{8}. \quad (4)$$

For any  $i \in [m]$ , since  $\mathbf{x}_1, \dots, \mathbf{x}_m$  are orthogonal and of norm  $b_x$ , we have

$$\mathbf{u}^\top \sigma(W \mathbf{x}_i) = \mathbf{u}^\top \sigma \left( \frac{\delta}{b_x^2} V \text{diag}(\mathbf{y}) X^\top \mathbf{x}_i \right) = \mathbf{u}^\top \sigma(\delta y_i \mathbf{v}_i) = \frac{b}{\sqrt{n}} \sum_{j=1}^n \sigma(\delta y_i V_{j,i})$$

where  $\mathbf{v}_i$  is the  $i$ -th column of  $V$ , and  $V_{j,i}$  is the entry of  $V$  in the  $j$ -th row and  $i$ -th column. Then we have the following:

- If  $y_i = 0$ , this equals  $b\sqrt{n}\sigma(0) = 0$ .
- If  $y_i = 1$ , this equals  $b\sqrt{n}(p_i\sigma(\delta) + (1 - p_i)\sigma(-\delta))$ , where  $p_i \in [\frac{1}{2} - \frac{\alpha}{8}, \frac{1}{2} + \frac{\alpha}{8}]$  is the portion of entries in the  $i$ -th column of  $V$  with value  $+1$ . Rewriting it and using Eq. (2), Eq. (4) and the fact that  $\sigma(\cdot)$  is 1-Lipschitz on  $[-1, +1]$ , we get the expression

$$b\sqrt{n} \left( \frac{\sigma(\delta) + \sigma(-\delta)}{2} - \left( \frac{1}{2} - p_i \right) (\sigma(\delta) - \sigma(-\delta)) \right) \geq b\sqrt{n} \left( \frac{\delta\alpha}{2} - \frac{\alpha}{8} \cdot 2\delta \right) = \frac{b\sqrt{n}\delta\alpha}{4}.$$

Recalling Eq. (3), we get that by fixing  $s = \frac{\sqrt{n}\delta\alpha}{8}$ , we can shatter the dataset as long as

$$\frac{b\sqrt{n}\delta\alpha}{8} \geq \epsilon \quad \Rightarrow \quad \delta \geq \frac{8\epsilon}{\alpha b\sqrt{n}}. \quad (5)$$

Leaving this condition for a moment, we now turn to specify how  $\delta, V$  is chosen, so as to satisfy the condition  $\|W\| = \left\| \frac{\delta}{b_x^2} V \text{diag}(\mathbf{y}) X^\top \right\| \leq B$ . To that end, we let  $V$  be any  $\pm 1$ -valued  $n \times m$  matrix which satisfies Eq. (4) as well as  $\|V\| \leq c(\sqrt{n} + \sqrt{m})$ , where  $c \geq 1$  is some universal constant.

Such a matrix necessarily exists assuming  $m$  is sufficiently larger than  $\frac{1}{\alpha^2}$ . It then follows that  $\|W\| \leq \frac{\delta}{b_x^2} \|V\| \cdot \|\text{diag}(\mathbf{y})\| \cdot \|X\| \leq \frac{\delta}{b_x^2} \cdot c(\sqrt{n} + \sqrt{m}) \cdot b_x = \frac{\delta}{b_x} \cdot c(\sqrt{n} + \sqrt{m})$ . Therefore, by assuming

$$\delta \leq \frac{Bb_x}{c(\sqrt{n} + \sqrt{m})},$$

we ensure that  $\|W\| \leq B$ .

Collecting the conditions on  $\delta$  (namely, that it is in  $(0, 1)$ , satisfies Eq. (5), as well as the displayed equation above), we get that there is an appropriate choice of  $\delta$  and we can shatter our  $m$  points, as long as  $m$  is sufficiently larger than  $1/\alpha^2$  and that

$$1 > \frac{Bb_x}{c(\sqrt{n} + \sqrt{m})} \geq \frac{8\epsilon}{\alpha b \sqrt{n}}.$$

The first inequality is satisfied if (say) we can choose  $m \geq (Bb_x/c)^2$  (which we will indeed do in the sequel). As to the second inequality, it is certainly satisfied if  $m \geq n$ , as well as

$$\frac{Bb_x}{2c\sqrt{m}} \geq \frac{8\epsilon}{\alpha b \sqrt{n}} \implies m \leq \left(\frac{\alpha}{16c}\right)^2 \cdot \frac{(bBb_x)^2 n}{\epsilon^2}.$$

Thus, we can shatter any number  $m$  of points up to this upper bound. Picking  $m$  on this order (assuming it is sufficiently larger than  $1/\alpha^2$ ,  $B^2$  or  $n$ ), assuming that the dimension  $d$  is larger than  $m$ , and renaming the universal constants, the result follows.

## A.2 Proof of Thm. 2

To simplify notation, we rewrite  $\sup_{\mathbf{u}, W: \|\mathbf{u}\| \leq b, \|W\|_F \leq B}$  as simply  $\sup_{\mathbf{u}, W}$ . Also, we let  $\mathbf{w}_j$  denote the  $j$ -th row of the matrix  $W$ .

Fix some set of inputs  $\mathbf{x}_1, \dots, \mathbf{x}_m$  with norm at most  $b_x$ . The Rademacher complexity equals

$$\begin{aligned} \mathbb{E}_\epsilon \sup_{\mathbf{u}, W} \frac{1}{m} \sum_{i=1}^m \epsilon_i \mathbf{u}^\top \sigma(W \mathbf{x}_i) &= \mathbb{E}_\epsilon \sup_{\mathbf{u}, W} \frac{1}{m} \mathbf{u}^\top \left( \sum_{i=1}^m \epsilon_i \sigma(W \mathbf{x}_i) \right) \\ &= \frac{b}{m} \cdot \mathbb{E}_\epsilon \sup_W \left\| \sum_{i=1}^m \epsilon_i \sigma(W \mathbf{x}_i) \right\| = \frac{b}{m} \cdot \mathbb{E}_\epsilon \sup_W \sqrt{\sum_{j=1}^n \left( \sum_{i=1}^m \epsilon_i \sigma(\mathbf{w}_j^\top \mathbf{x}_i) \right)^2}. \end{aligned}$$

Each matrix in the set  $\{W \in \mathbb{R}^{d \times n} : \|W\|_F \leq B\}$  is composed of rows, whose sum of squared norms is at most  $B^2$ . Thus, the set can be equivalently defined as the set of  $d \times n$  matrices, where each row  $j$  equals  $v_j \mathbf{w}_j$  for some  $v_j > 0$ ,  $\|\mathbf{w}_j\|_j \leq 1$ , and  $\|(v_1, \dots, v_n)\|^2 = \|\mathbf{v}\|^2 \leq B^2$ . Noting that each  $v_j$  is positive, we can upper bound the expression in the displayed equation above as follows:

$$\begin{aligned} &\frac{b}{m} \cdot \mathbb{E}_\epsilon \sup_{\mathbf{v}, \{\mathbf{w}_j\}} \sqrt{\sum_{j=1}^n \left( \sum_{i=1}^m \epsilon_i \sigma(v_j \mathbf{w}_j^\top \mathbf{x}_i) \right)^2} \\ &= \frac{b}{m} \cdot \mathbb{E}_\epsilon \sup_{\mathbf{v}, \{\mathbf{w}_j\}} \sqrt{\sum_{j=1}^n v_j^2 \left( \sum_{i=1}^m \frac{\epsilon_i}{v_j} \sigma(v_j \mathbf{w}_j^\top \mathbf{x}_i) \right)^2} \\ &\leq \frac{b}{m} \cdot \mathbb{E}_\epsilon \sup_{\mathbf{v}, \mathbf{v}', \{\mathbf{w}_j\}} \sqrt{\sum_{j=1}^n v_j'^2 \left( \sum_{i=1}^m \frac{\epsilon_i}{v_j} \sigma(v_j \mathbf{w}_j^\top \mathbf{x}_i) \right)^2}, \end{aligned} \tag{6}$$

where  $\mathbf{v}' = (v'_1, \dots, v'_n)$  satisfies  $\|\mathbf{v}'\|^2 = \sum_{j=1}^n v_j'^2 \leq B^2$  (note that  $\mathbf{v}$  must also satisfy this constraint). Considering this constraint in Eq. (6), we see that for any choice of  $\epsilon, \mathbf{v}$  and  $\mathbf{w}_1, \dots, \mathbf{w}_n$ , the supremum over  $\mathbf{v}'$  is clearly attained by letting  $v'_{j^*} = B$  for some  $j^*$  for which

<sup>2</sup>This follows from the probabilistic method: If we pick the entries of  $V$  uniformly at random, then both conditions will hold with some arbitrarily large probability (assuming  $m$  is sufficiently larger than  $1/\alpha^2$ , see for example Segner [2000]), hence the required matrix will result with some positive probability.

$\left(\sum_{i=1}^m \frac{\epsilon_i}{v_j} \sigma(v_j \mathbf{w}_j^\top \mathbf{x}_i)\right)^2$  is maximized, and  $v'_j = 0$  for all  $j \neq j^*$ . Plugging this observation back into Eq. (6) and writing the supremum constraints explicitly, we can upper bound the displayed equation by

$$\begin{aligned} & \frac{bB}{m} \cdot \mathbb{E}_\epsilon \sup_{\mathbf{v}: \min_j v_j > 0, \|\mathbf{v}\| \leq B} \sup_{\mathbf{w}_1, \dots, \mathbf{w}_n: \max_j \|\mathbf{w}_j\| \leq 1} \max_j \left| \sum_{i=1}^m \frac{\epsilon_i}{v_j} \sigma(v_j \mathbf{w}_j^\top \mathbf{x}_i) \right| \\ &= \frac{bB}{m} \cdot \mathbb{E}_\epsilon \sup_{v \in (0, B], \mathbf{w}: \|\mathbf{w}\| \leq 1} \left| \sum_{i=1}^m \frac{\epsilon_i}{v} \sigma(v \mathbf{w}^\top \mathbf{x}_i) \right| \\ &= \frac{bB}{m} \cdot \mathbb{E}_\epsilon \sup_{v \in (0, B], \mathbf{w}: \|\mathbf{w}\| \leq 1} \left| \sum_{i=1}^m \epsilon_i \psi_v(\mathbf{w}^\top \mathbf{x}_i) \right|, \end{aligned} \quad (7)$$

where  $\psi_v(z) := \frac{\sigma(vz)}{v}$  for any  $z \in \mathbb{R}$ . Since  $\sigma(\cdot)$  is  $L$ -Lipschitz, it follows that  $\psi_v(\cdot)$  is also  $L$ -Lipschitz regardless of  $v$ , since for any  $z, z' \in \mathbb{R}$ ,

$$|\psi_v(z) - \psi_v(z')| = \frac{|\sigma(vz) - \sigma(vz')|}{v} \leq \frac{L|vz - vz'|}{v} = L|z - z'|.$$

Thus, the supremum over  $v$  in Eq. (7) corresponds to a supremum over a class of  $L$ -Lipschitz functions which all equal 0 at the origin (since  $\psi_v(0) = \frac{\sigma(0)}{v} = 0$  by assumption). As a result, we can upper bound Eq. (7) by

$$\frac{bB}{m} \cdot \mathbb{E}_\epsilon \sup_{\psi \in \Psi_L, \mathbf{w}: \|\mathbf{w}\| \leq 1} \left| \sum_{i=1}^m \epsilon_i \psi(\mathbf{w}^\top \mathbf{x}_i) \right|,$$

where  $\Psi_L$  is the class of *all*  $L$ -Lipschitz functions which equal 0 at the origin.

To continue, it will be convenient to get rid of the absolute value in the displayed expression above. This can be done by noting that the expression equals

$$\begin{aligned} & \frac{bB}{m} \cdot \mathbb{E}_\epsilon \sup_{\psi \in \Psi_L, \mathbf{w}: \|\mathbf{w}\| \leq 1} \max \left\{ \sum_{i=1}^m \epsilon_i \psi(\mathbf{w}^\top \mathbf{x}_i), -\sum_{i=1}^m \epsilon_i \psi(\mathbf{w}^\top \mathbf{x}_i) \right\} \\ & \stackrel{(*)}{\leq} \frac{bB}{m} \cdot \mathbb{E}_\epsilon \left[ \sup_{\psi \in \Psi_L, \mathbf{w}: \|\mathbf{w}\| \leq 1} \sum_{i=1}^m \epsilon_i \psi(\mathbf{w}^\top \mathbf{x}_i) + \sup_{\psi \in \Psi_L, \mathbf{w}: \|\mathbf{w}\| \leq 1} -\sum_{i=1}^m \epsilon_i \psi(\mathbf{w}^\top \mathbf{x}_i) \right] \\ & \stackrel{(**)}{=} \frac{2bB}{m} \cdot \mathbb{E}_\epsilon \sup_{\psi \in \Psi_L, \mathbf{w}: \|\mathbf{w}\| \leq 1} \sum_{i=1}^m \epsilon_i \psi(\mathbf{w}^\top \mathbf{x}_i), \end{aligned} \quad (8)$$

where  $(*)$  follows from the fact that  $\max\{a, b\} \leq a + b$  for non-negative  $a, b$  and the observation that the supremum is always non-negative (it is only larger, say, than the specific choice of  $\psi$  being the zero function), and  $(**)$  is by symmetry of the function class  $\Psi_L$  (if  $\psi \in \Psi_L$ , then  $-\psi \in \Psi_L$  as well).

Considering Eq. (8), this is  $2bB$  times the Rademacher complexity of the function class  $\{\mathbf{x} \mapsto \psi(\mathbf{w}^\top \mathbf{x}) : \psi \in \Psi_L, \|\mathbf{w}\| \leq 1\}$ . In other words, this class is a composition of all linear functions of norm at most 1, and all univariate  $L$ -Lipschitz functions crossing the origin. Fortunately, the Rademacher complexity of such composed classes was analyzed in Golowich et al. [2017] for a different purpose. In particular, noting that  $\mathbf{w}^\top \mathbf{x}_i$  is bounded in  $[-b_x, b_x]$ , and applying Theorem 4 from that paper, we get that Eq. (8) is upper bounded by

$$2bB \cdot cL \left( \frac{b_x}{\sqrt{m}} + \log^{3/2}(m) \cdot \mathcal{R}_m(\mathcal{H}) \right) \quad (9)$$

for some universal constant  $c > 0$ , where  $\mathcal{H} = \{\mathbf{x} \mapsto \mathbf{w}^\top \mathbf{x} : \|\mathbf{w}\| \leq 1\}$ , and  $\mathcal{R}_m(\mathcal{H})$  is the Rademacher complexity of  $\mathcal{H}$ .

To complete the proof, we need to employ a standard upper bound on  $\hat{\mathcal{R}}_m(\mathcal{H})$  (see Bartlett and Mendelson [2002], Shalev-Shwartz and Ben-David [2014]), which we derive below for completeness:

$$\begin{aligned}
\hat{\mathcal{R}}_m(\mathcal{H}) &= \mathbb{E}_\epsilon \sup_{h \in \mathcal{H}} \frac{1}{m} \sum_{i=1}^m \epsilon_i h(\mathbf{x}_i) = \frac{1}{m} \mathbb{E}_\epsilon \sup_{\mathbf{w}: \|\mathbf{w}\| \leq 1} \sum_{i=1}^m \epsilon_i \mathbf{w}^\top \mathbf{x}_i \\
&= \frac{1}{m} \mathbb{E}_\epsilon \sup_{\mathbf{w}: \|\mathbf{w}\| \leq 1} \mathbf{w}^\top \left( \sum_{i=1}^m \epsilon_i \mathbf{x}_i \right) \stackrel{(*)}{=} \frac{1}{m} \mathbb{E}_\epsilon \left\| \sum_{i=1}^m \epsilon_i \mathbf{x}_i \right\| \\
&\stackrel{(**)}{\leq} \frac{1}{m} \sqrt{\mathbb{E}_\epsilon \left\| \sum_{i=1}^m \epsilon_i \mathbf{x}_i \right\|^2} = \frac{1}{m} \sqrt{\mathbb{E}_\epsilon \sum_{i,i'=1}^m \epsilon_i \epsilon_{i'} \mathbf{x}_i^\top \mathbf{x}_{i'}} \\
&= \frac{1}{m} \sqrt{\sum_{i=1}^m \|\mathbf{x}_i\|^2} \leq \frac{1}{m} \sqrt{m b_x^2} = \frac{b_x}{\sqrt{m}},
\end{aligned}$$

where  $(*)$  is by the Cauchy-Schwarz inequality, and  $(**)$  is by Jensen's inequality. Plugging this back into Eq. (9), we get the following upper bound:

$$2bB \cdot cL \left( \frac{b_x}{\sqrt{m}} + \log^{3/2}(m) \cdot \frac{b_x}{\sqrt{m}} \right) = 2cbBb_xL \cdot \frac{1 + \log^{3/2}(m)}{\sqrt{m}}.$$

Upper bounding this by  $\epsilon$ , solving for  $m$  and simplifying a bit, the result follows.

### A.3 Proof of Thm. 3

We fix a number of inputs  $m$  to be chosen later. We let  $X$  be the  $d \times m$  matrix whose  $i$ -th column is  $\mathbf{x}_i$ . We choose  $X$  to be any matrix such that the following conditions hold for some universal constant  $c > 0$ :

- Every entry of  $X$  is in  $\{\pm \frac{b_x}{\sqrt{d}}\}$  (hence  $\forall i, \|\mathbf{x}_i\| = 1$ )
- $\max_{i' \neq i} |\mathbf{x}_i^\top \mathbf{x}_{i'}| \leq cb_x^2 \sqrt{\frac{\log(d)}{d}}$
- $\|X\| \leq cb_x (1 + \sqrt{\frac{m}{d}})$ .

The existence of such a matrix follows from the probabilistic method: If we simply choose each entry of  $X$  independently and uniformly from  $\{\pm \frac{1}{\sqrt{d}}\}$ , then the first condition automatically holds; The second condition holds with high probability by a standard concentration of measure argument and a union bound; And the third condition holds with arbitrarily high constant probability (by Markov's inequality and the fact that  $\mathbb{E}[\|\frac{\sqrt{d}}{b_x} \cdot X\|] \leq c(\sqrt{d} + \sqrt{m})$ , see for example Seginer [2000]). Thus, by a union bound, a random matrix satisfies all of the above with some positive probability, hence such a matrix  $X$  exists.

Given this input set, it is enough to show that for any  $\mathbf{y} \in \{0, 1\}^m$ , we can find a predictor (namely,  $\mathbf{u}, W$  depending on  $\mathbf{y}$ ) in our class, such that  $\|\mathbf{u}\| \leq b$ ,  $\|W\| \leq B$ , and

$$\forall i, \mathbf{u}^\top \sigma(W \mathbf{x}_i) \text{ is } \begin{cases} \leq 0 & y_i = 0 \\ \geq 2\epsilon & y_i = 1 \end{cases}. \quad (10)$$

We will do so as follows: Letting  $a \geq 0, p \in [0, 1]$  be some parameters to be chosen later, we let

$$\mathbf{u} = \frac{b}{\sqrt{n}} \mathbf{1} \quad \text{and} \quad W = \frac{1}{b_x^2} \cdot V \text{diag}(\mathbf{y}) X^\top,$$

Where  $V \in \mathbb{R}^{n \times m}$  is a random matrix with i.i.d. entries chosen as follows:

$$V_{k,i} = \begin{cases} 0 & \text{w.p. } 1-p \\ a & \text{w.p. } \frac{p}{2} \\ -a & \text{w.p. } \frac{p}{2}. \end{cases}$$

Note that the condition  $\|\mathbf{u}\| \leq b$  follows directly from the definition of  $\mathbf{u}$ . We will show that there is a way to choose the parameters  $a, p$  such that the following holds: For any  $\mathbf{y} \in \{0, 1\}^m$ , with high probability over the choice of  $V$ , Eq. (10) holds as well as  $\|W\| \leq B$ . This implies that for any  $\mathbf{y}$ , there exists some fixed choice of  $V$  (and hence  $W$ ) such that  $\|W\| \leq B$  as well as Eq. (10) holds, implying the theorem statement.

We break this argument into two lemmas:

**Lemma 1.** *There exists a universal constant  $c' > 0$  such that the following holds: For any  $\epsilon \geq 0$ ,  $\delta \in (0, \exp(-1))$  and  $\mathbf{y} \in \{0, 1\}^m$ , if we assume*

$$\beta = c' a \sqrt{\frac{\log(d)}{d}} \log\left(\frac{m}{\delta}\right) (\sqrt{pm} + 1)$$

as well as  $a \geq 4\beta$  and  $bap\sqrt{n} \geq 8\epsilon$ , then Eq. (10) holds with probability at least  $1 - \delta - m \exp(-pn/16)$  over the choice of  $V$ .

*Proof.* Let  $\mathbf{w}_k$  be the  $k$ -th row of  $W$ . Fixing some  $i \in [m]$ , we have

$$\begin{aligned} \mathbf{u}^\top \sigma(W\mathbf{x}_i) &= \mathbf{u}^\top [W\mathbf{x}_i - \beta]_+ = \frac{b}{\sqrt{n}} \sum_{k=1}^n [\mathbf{w}_k^\top \mathbf{x}_i - \beta]_+ = \frac{b}{\sqrt{n}} \sum_{k=1}^n \left[ \sum_{i'=1}^m \frac{1}{b_x^2} V_{k,i'} y_{i'} \mathbf{x}_{i'}^\top \mathbf{x}_i - \beta \right]_+ \\ &= \frac{b}{\sqrt{n}} \sum_{k=1}^n \left[ V_{k,i} y_i + \sum_{i' \neq i} \frac{1}{b_x^2} V_{k,i'} y_{i'} \mathbf{x}_{i'}^\top \mathbf{x}_i - \beta \right]_+. \end{aligned} \quad (11)$$

Recalling the assumptions on  $X$  and the random choice of  $V$ , note that  $\sum_{i' \neq i} \frac{1}{b_x^2} V_{k,i'} y_{i'} \mathbf{x}_{i'}^\top \mathbf{x}_i$  is the sum of  $m - 1$  independent random variables, each with mean 0, absolute value at most  $|\frac{a}{b_x^2} y_{i'} \mathbf{x}_{i'}^\top \mathbf{x}_i| \leq ac \sqrt{\frac{\log(d)}{d}}$ , and standard deviation at most  $\sqrt{p} \cdot ac \sqrt{\frac{\log(d)}{d}}$ . Thus, by Bernstein's inequality, for any  $\delta \in (0, \exp(-1))$ , it holds with probability at least  $1 - \delta$  that

$$\begin{aligned} \left| \sum_{i' \neq i} \frac{1}{b_x^2} V_{k,i'} y_{i'} \mathbf{x}_{i'}^\top \mathbf{x}_i \right| &\leq c' \left( \sqrt{p} \cdot a \sqrt{\frac{\log(d)}{d}} \cdot \sqrt{(m-1) \log\left(\frac{1}{\delta}\right)} + a \sqrt{\frac{\log(d)}{d}} \cdot \log\left(\frac{1}{\delta}\right) \right) \\ &\leq c' a \sqrt{\frac{\log(d)}{d}} \log\left(\frac{1}{\delta}\right) (\sqrt{pm} + 1), \end{aligned}$$

where  $c' > 0$  is some universal constant. Applying a union bound over all  $i \in [m]$ , we get that with probability at least  $1 - \delta$ ,

$$\max_{i \in [m]} \left| \sum_{i' \neq i} \frac{1}{b_x^2} V_{k,i'} y_{i'} \mathbf{x}_{i'}^\top \mathbf{x}_i \right| \leq c' a \sqrt{\frac{\log(d)}{d}} \log\left(\frac{m}{\delta}\right) (\sqrt{pm} + 1).$$

Recalling that we choose  $\beta$  to equal this upper bound, and plugging back into Eq. (11), we get that with probability at least  $1 - \delta$ ,

$$\forall i \in [m], \quad \mathbf{u}^\top \sigma(W\mathbf{x}_i) \text{ is } \begin{cases} \leq \frac{b}{\sqrt{n}} \sum_{k=1}^n [V_{k,i} y_i]_+ = 0 & \text{if } y_i = 0 \\ \geq \frac{b}{\sqrt{n}} \sum_{k=1}^n [V_{k,i} y_i - 2\beta]_+ = \frac{b}{\sqrt{n}} \sum_{k=1}^n [V_{k,i} - 2\beta]_+ & \text{if } y_i = 1 \end{cases}.$$

Moreover, by the assumption  $a \geq 4\beta$ , we have

$$\frac{b}{\sqrt{n}} \sum_{k=1}^n [V_{k,i} - 2\beta]_+ \geq \frac{b}{\sqrt{n}} \sum_{k: V_{k,i}=a} \left[ a - \frac{a}{2} \right]_+ \geq \frac{ba}{2\sqrt{n}} \sum_{k: V_{k,i}=a} 1.$$

Note that  $\mathbb{E}_V [\sum_{k: V_{k,i}=a} 1] = \frac{pn}{2}$ . Thus, by a standard multiplicative Chernoff bound and a union bound,  $\sum_{k: V_{k,i}=a} 1 \geq \frac{pn}{4}$  simultaneously for all  $i \in [m]$ , with probability at least  $1 - m \exp(-pn/16)$ . Combining with the above using a union bound, we get that with probability at least  $1 - \delta - m \exp(-pn/16)$  over the choice of  $V$ ,

$$\forall i \in [m], \quad \mathbf{u}^\top \sigma(W\mathbf{x}_i) \text{ is } \begin{cases} \leq 0 & \text{if } y_i = 0 \\ \geq \frac{bap\sqrt{n}}{4} & \text{if } y_i = 1 \end{cases}.$$

Since we assume  $\frac{bap\sqrt{n}}{4} \geq 2\epsilon$ , the result follows.  $\square$

**Lemma 2.** For any  $\mathbf{y} \in \{0, 1\}^m$ , with probability at least  $\frac{1}{2}$  over the random choice of  $V$ , the matrix  $W$  satisfies

$$\|W\|_F \leq \frac{a\sqrt{2nmp}}{b_x}.$$

*Proof.* By definition of  $W, V$  and  $X$ , we have

$$\begin{aligned} \mathbb{E}[\|W\|_F^2] &= \sum_{k=1}^n \sum_{i=1}^d \mathbb{E}[W_{k,i}^2] = \sum_{k=1}^n \sum_{i=1}^d \mathbb{E} \left[ \left( \sum_{j=1}^m \frac{1}{b_x^2} V_{k,j} y_j X_{i,j} \right)^2 \right] \\ &= \frac{1}{b_x^4} \cdot \sum_{k=1}^n \sum_{i=1}^d \mathbb{E} \left[ \sum_{j,j'=1}^m V_{k,j} V_{k,j'} y_j y_{j'} X_{i,j} X_{i,j'} \right] \\ &= \frac{1}{b_x^4} \cdot \sum_{k=1}^n \sum_{i=1}^d \sum_{j=1}^m \mathbb{E}[V_{k,j}^2 y_j^2 X_{i,j}^2] \leq \frac{1}{b_x^4} \cdot \frac{b_x^2}{d} \cdot \sum_{k=1}^n \sum_{i=1}^d \sum_{j=1}^m \mathbb{E}[V_{k,j}^2] \\ &= \frac{1}{b_x^2 d} \cdot ndm \cdot pa^2 = \frac{nmpa^2}{b_x^2}. \end{aligned}$$

By Markov's inequality, it follows that with probability at least  $\frac{1}{2}$ ,  $\|W\|_F^2 \leq 2 \cdot \frac{nmpa^2}{b_x^2}$ , from which the result follows.  $\square$

Combining Lemma 1 and Lemma 2, and choosing  $\delta = 1/4$ , we get that with some positive probability over the choice of  $V$ , both the shattering condition in Eq. (10) holds, as well as  $\|W\|_F \leq B$ , if the following combination of conditions are met (for suitable universal constant  $c_1 > 0$ ):

$$m \exp\left(-\frac{pm}{16}\right) < \frac{1}{4}, \quad a \geq c_1 a \sqrt{\frac{\log(d)}{d}} \log(4m)(\sqrt{pm}+1), \quad bap\sqrt{n} \geq 8\epsilon, \quad a\sqrt{2nmp} \leq Bb_x.$$

We now wish to choose the free parameters  $p, a$ , to ensure that all these conditions are met (hence we indeed manage to shatter the dataset), while allowing the size  $m$  of the shattered set to be as large as possible. We begin by noting that the first condition is satisfied if  $p > c_2 \frac{\log(m)}{n}$ , and the second condition is satisfied if  $d \geq c_3$  and  $p \leq c_4 \frac{d}{\log(d) \log^2(4m)m}$  (for suitable universal constants  $c_2, c_3, c_4 > 0$ ). Thus, it is enough to require

$$d \geq c_3, \quad c_2 \frac{\log(m)}{n} < p \leq c_4 \frac{d}{\log(d) \log^2(4m)m}, \quad bap\sqrt{n} \geq 8\epsilon, \quad a\sqrt{2nmp} \leq Bb_x. \quad (12)$$

Let us pick in particular

$$p = c_4 \frac{d}{\log(d) \log^2(4m)m}$$

(which is valid if it is in  $[0, 1]$  and if  $c_2 \frac{\log(m)}{n} \leq c_4 \frac{d}{\log(d) \log^2(4m)m}$ , or equivalently  $m \log(m) \log^2(4m) \leq \frac{c_4 nd}{c_2 \log(d)}$ ) and

$$a = \frac{8\epsilon}{bp\sqrt{n}} = \frac{8\epsilon \log(d) \log^2(4m)m}{c_4 bd\sqrt{n}}$$

(which automatically satisfied the third condition in Eq. (12)). Plugging into Eq. (12), the required conditions hold if we assume

$$d \geq c_3, \quad \frac{c_4 d}{\log(d) \log^2(4m)m} \leq 1, \quad m \log^3(4m) \leq \frac{c_5 nd}{\log(d)}, \quad c_6 \frac{\epsilon \sqrt{\log(d)} \log(4m)m}{b\sqrt{d}} \leq Bb_x$$

for appropriate universal constants  $c_5, c_6 > 0$ . The first two conditions are satisfied if we require  $m \geq c_7 d \geq c_8$  for suitable universal constants  $c_7, c_8 > 0$ . Thus, it is enough to require the set of conditions

$$m \geq c_6 d \geq c_7, \quad m \log^3(4m) \leq \frac{c_5 nd}{\log(d)}, \quad m \log(4m) \leq \frac{bBb_x \sqrt{d}}{c_6 \epsilon \sqrt{\log(d)}}.$$

All these conditions are satisfied if we assume  $d \geq c_7/c_6$ , pick

$$m = \tilde{\Theta} \left( \min \left\{ nd, \frac{bBb_x}{\epsilon} \sqrt{d} \right\} \right) \quad (13)$$

(with the  $\tilde{\Theta}$  hiding constants and factors polylogarithmic in  $d, n, b, B, b_x, \frac{1}{\epsilon}$ ), and assume that the parameters are such that this expression is sufficiently larger than  $d$ , and that  $d$  is larger than some universal constant.

It only remains to track what value of  $\beta$  we have chosen (as a function of the problem parameters). Combining Lemma 1, the choice of  $a, p$  from earlier, as well as Eq. (13), it follows that

$$\beta = \tilde{\Theta} \left( \frac{a}{\sqrt{d}} (1 + \sqrt{pm}) \right) = \tilde{\Theta} \left( \frac{\epsilon m}{bd\sqrt{dn}} (1 + \sqrt{d}) \right) = \tilde{\Theta} \left( \frac{\epsilon m}{bd\sqrt{n}} \right) = \tilde{\Theta} \left( \min \left\{ \frac{\epsilon\sqrt{n}}{b}, \frac{Bb_x}{\sqrt{dn}} \right\} \right),$$

which is at most  $\tilde{O}(Bb_x/\sqrt{dn})$ .

#### A.4 Proof of Corollary 1

Thm. 3 implies that a certain dataset  $\{\mathbf{x}_i\}_{i=1}^m$  of points in  $\mathbb{R}^d$  of norm at most  $b_x$  (where  $m$  is the lower bound stated in the theorem) can be shattered with margin  $\epsilon$ , using networks in  $\mathcal{F}_{b,B,n,d}^\sigma$  of the form  $\mathbf{x} \mapsto \mathbf{u}^\top \sigma(W\mathbf{x})$ , where  $\sigma = [z - \beta]_+$  for some  $\beta \in [0, \tilde{O}(\frac{Bb_x}{\sqrt{dn}})]$ . Our key observation is the following: Any network  $\mathbf{x} \mapsto \mathbf{u}^\top \sigma(W\mathbf{x})$  can be equivalently written as  $\tilde{\mathbf{x}} \mapsto \mathbf{u}^\top [\tilde{W}\tilde{\mathbf{x}}]_+$ , where  $\tilde{\mathbf{x}} = (\mathbf{x}, b_x)$ , and  $\tilde{W} = [W, -\frac{\beta}{b_x} \cdot \mathbf{1}]$  (namely, we add to  $W$  another column with every entry being equal to  $-\frac{\beta}{b_x}$ ). Note that if  $\|\mathbf{x}\| \leq b_x$ , then  $\|\tilde{\mathbf{x}}\| \leq \sqrt{2}b_x$ , and  $\|\tilde{W}\| \leq \|W\| + \|\frac{\beta}{b_x} \cdot \mathbf{1}\| \leq B + \frac{\beta}{b_x} \sqrt{n} \leq 2B$  under the corollary's conditions. Thus, if we can shatter a set of points  $\{\mathbf{x}_i\}_{i=1}^m$  in the unit ball in  $\mathbb{R}^d$  using networks from  $\mathcal{F}_{b,B,n,d}^\sigma$ , we can also shatter  $\{\tilde{\mathbf{x}}_i\}_{i=1}^m$  in  $\mathbb{R}^{d+1}$  (with norm  $\leq \sqrt{2}b_x$ ) using networks from  $\mathcal{F}_{b,2B,n,d+1}^{[\cdot]_+}$ . Rescaling  $b_x, B, d$  appropriately, we get the same shattering number lower bound for  $\mathcal{F}_{b,B,n,d}^{[\cdot]_+}$  and inputs with norm  $\leq b_x$  up to small numerical constants which get absorbed into the  $\tilde{\Omega}(\cdot)$  notation.

#### A.5 Proofs of Thm. 4 and Thm. 5

In what follows, given a vector  $\mathbf{u}_i$ , we let  $u_{i,j}$  denote its  $j$ -th entry.

The proofs rely on the following two key technical lemmas:

**Lemma 3.** *Let  $W$  be a matrix such that  $\|W\| \leq 1$ , with row vectors  $\mathbf{w}_1, \mathbf{w}_2, \dots$ . Then the following holds for any set of vectors  $\{\mathbf{u}_i\}$  with the same dimensionality as  $\mathbf{w}_1$ , and any scalars  $\{z_{i,\ell}\}, \{z_i\}$  indexed by  $i, \ell$ :*

$$\sum_{\ell} \left( \sum_i (\mathbf{w}_{\ell}^\top \mathbf{u}_i) z_{i,\ell} \right)^2 \leq \sum_{\ell,r} \left( \sum_i u_{i,r} z_{i,\ell} \right)^2$$

and

$$\sum_{\ell} \left( \sum_i (\mathbf{w}_{\ell}^\top \mathbf{u}_i) z_i \right)^2 \leq \sum_r \left( \sum_i u_{i,r} z_i \right)^2,$$

where the sum  $r$  is over all all coordinates of each  $\mathbf{u}_i$ .

*Proof.* Starting with the first inequality, the left hand side equals

$$\sum_{\ell} \left( \mathbf{w}_{\ell}^\top \left( \sum_i \mathbf{u}_i z_{i,\ell} \right) \right)^2 \leq \sum_{\ell, \ell'} \left( \mathbf{w}_{\ell'}^\top \left( \sum_i \mathbf{u}_i z_{i,\ell} \right) \right)^2 = \sum_{\ell} \left\| W^\top \left( \sum_i \mathbf{u}_i z_{i,\ell} \right) \right\|^2.$$

By Cauchy-Schwartz and the assumption  $\|W\| \leq 1$ , this is at most  $\sum_{\ell} \left\| \sum_i \mathbf{u}_i z_{i,\ell} \right\|^2 = \sum_{\ell,r} \left( \sum_i u_{i,r} z_{i,\ell} \right)^2$ . As to the second inequality, the left hand side

equals

$$\sum_{\ell} \left( \mathbf{w}_{\ell}^{\top} \left( \sum_i \mathbf{u}_i z_i \right) \right)^2 = \left\| W^{\top} \left( \sum_i \mathbf{u}_i z_i \right) \right\|^2 \leq \left\| \sum_i \mathbf{u}_i z_i \right\|^2 = \sum_r \left( \sum_i u_{i,r} z_i \right)^2$$

where we again used Cauchy Schwartz and the assumption  $\|W\| \leq 1$ .  $\square$

**Lemma 4.** Given a vector  $\mathbf{u} \in \mathbb{R}^{d_{in}}$ , a matrix  $W \in \mathbb{R}^{d_{out} \times d_{in}}$  with row vectors  $\mathbf{w}_1, \mathbf{w}_2, \dots$  such that  $\|W\| \leq B$ , and a positive integer  $k$ , define

$$f(\mathbf{u}) = (W\mathbf{u})^{\circ k},$$

where  $\circ^k$  denotes taking the  $k$ -th power element-wise. Then for any positive integer  $r$ , any vectors  $\mathbf{u}_1, \mathbf{u}_2, \dots$  in  $\mathbb{R}^{d_{in}}$  and any scalars  $\epsilon_1, \epsilon_2, \dots$ , it holds that

$$\sum_{\ell_1, \dots, \ell_r=1}^{d_{out}} \left( \sum_i \epsilon_i f(\mathbf{u}_i)_{\ell_1} \cdots f(\mathbf{u}_i)_{\ell_r} \right)^2 \leq B^{2rk} \cdot \sum_{\ell_1, \dots, \ell_{rk}=1}^{d_{in}} \left( \sum_i \epsilon_i u_{i, \ell_1} \cdots u_{i, \ell_{rk}} \right)^2.$$

*Proof.* It is enough to prove the result for  $W$  such that  $\|W\| = 1$  (and therefore  $B = 1$ ): For any other  $W$ , apply the result on  $\tilde{f}(\mathbf{u}) := (\frac{W}{\|W\|}\mathbf{u})^{\circ k} = \frac{1}{\|W\|^k} f(\mathbf{u})$ , and rescale accordingly.

The left hand side equals

$$\sum_{\ell_1 \dots \ell_r=1}^{d_{out}} \left( \sum_i \epsilon_i (\mathbf{w}_{\ell_1}^{\top} \mathbf{u}_i)^{\circ k} \cdots (\mathbf{w}_{\ell_r}^{\top} \mathbf{u}_i)^{\circ k} \right)^2 \quad (14)$$

Note that the term inside the square involves the product of  $rk$  terms. We now simplify them one-by-one using Lemma 3: To start, we note that the above can be written as

$$\sum_{\ell_2 \dots \ell_r=1}^{d_{out}} \sum_{\ell_1=1}^{d_{out}} \left( \sum_i (\mathbf{w}_{\ell_1}^{\top} \mathbf{u}_i) \cdot \epsilon_i (\mathbf{w}_{\ell_1}^{\top} \mathbf{u}_i)^{\circ k-1} (\mathbf{w}_{\ell_2}^{\top} \mathbf{u}_i)^{\circ k} \cdots (\mathbf{w}_{\ell_r}^{\top} \mathbf{u}_i)^{\circ k} \right)^2$$

Denoting  $\epsilon_i (\mathbf{w}_{\ell_1}^{\top} \mathbf{u}_i)^{\circ k-1} (\mathbf{w}_{\ell_2}^{\top} \mathbf{u}_i)^{\circ k} \cdots (\mathbf{w}_{\ell_r}^{\top} \mathbf{u}_i)^{\circ k}$  as  $z_{i, \ell_1}$  and plugging the first inequality in Lemma 3, the above is at most

$$\sum_{\ell_2 \dots \ell_r=1}^{d_{out}} \sum_{\ell_1=1}^{d_{out}} \sum_{\ell'_1=1}^{d_{in}} \left( \sum_i u_{i, \ell'_1} \epsilon_i (\mathbf{w}_{\ell_1}^{\top} \mathbf{u}_i)^{\circ k-1} (\mathbf{w}_{\ell_2}^{\top} \mathbf{u}_i)^{\circ k} \cdots (\mathbf{w}_{\ell_r}^{\top} \mathbf{u}_i)^{\circ k} \right)^2$$

Again pulling out one of the product terms in front, we can rewrite this as

$$\sum_{\ell_2 \dots \ell_r=1}^{d_{out}} \sum_{\ell'_1=1}^{d_{in}} \sum_{\ell_1=1}^{d_{out}} \left( \sum_i (\mathbf{w}_{\ell_1}^{\top} \mathbf{u}_i) \cdot u_{i, \ell'_1} \epsilon_i (\mathbf{w}_{\ell_1}^{\top} \mathbf{u}_i)^{\circ k-2} (\mathbf{w}_{\ell_2}^{\top} \mathbf{u}_i)^{\circ k} \cdots (\mathbf{w}_{\ell_r}^{\top} \mathbf{u}_i)^{\circ k} \right)^2.$$

Again using the first inequality in Lemma 3, this is at most

$$\sum_{\ell_2 \dots \ell_r=1}^{d_{out}} \sum_{\ell'_1, \ell''_1=1}^{d_{in}} \sum_{\ell_1=1}^{d_{out}} \left( \sum_i u_{i, \ell'_1} u_{i, \ell''_1} \epsilon_i (\mathbf{w}_{\ell_1}^{\top} \mathbf{u}_i)^{\circ k-2} (\mathbf{w}_{\ell_2}^{\top} \mathbf{u}_i)^{\circ k} \cdots (\mathbf{w}_{\ell_r}^{\top} \mathbf{u}_i)^{\circ k} \right)^2.$$

Repeating this to get rid of all but the last  $(\mathbf{w}_{\ell_1}^{\top} \mathbf{u}_i)$  term, we get the upper bound

$$\sum_{\ell_2 \dots \ell_r=1}^{d_{out}} \sum_{\ell_1^1 \dots \ell_1^{k-1}=1}^{d_{in}} \sum_{\ell_1=1}^{d_{out}} \left( \sum_i u_{i, \ell_1^1} \cdots u_{i, \ell_1^{k-1}} \epsilon_i (\mathbf{w}_{\ell_1}^{\top} \mathbf{u}_i) (\mathbf{w}_{\ell_2}^{\top} \mathbf{u}_i)^{\circ k} \cdots (\mathbf{w}_{\ell_r}^{\top} \mathbf{u}_i)^{\circ k} \right)^2.$$

Again pulling the last  $(\mathbf{w}_{\ell_1}^{\top} \mathbf{u}_i)$  term in front, and applying now the second inequality in Lemma 3 (as the remaining terms in the product no longer depend on  $\ell_1$ ), we get the upper bound

$$\sum_{\ell_2 \dots \ell_r=1}^{d_{out}} \sum_{\ell_1^1 \dots \ell_1^k=1}^{d_{in}} \left( \sum_i u_{i, \ell_1^1} \cdots u_{i, \ell_1^k} \epsilon_i (\mathbf{w}_{\ell_2}^{\top} \mathbf{u}_i)^{\circ k} \cdots (\mathbf{w}_{\ell_r}^{\top} \mathbf{u}_i)^{\circ k} \right)^2.$$



Recalling that this is an upper bound on Eq. (14), and applying the same procedure now on the  $(\mathbf{w}_{\ell_2}^\top \mathbf{u}_i), (\mathbf{w}_{\ell_3}^\top \mathbf{u}_i) \dots$  terms, we get overall an upper bound of the form

$$\sum_{\ell_1^1 \dots \ell_k^1=1}^{d_{in}} \cdots \sum_{\ell_1^r \dots \ell_r^k=1}^{d_{in}} \left( \sum_i u_{i, \ell_1^1} \cdots u_{i, \ell_r^k} \epsilon_i \right)^2.$$

Re-labeling the  $r k$  indices as  $\ell_1, \dots, \ell_{rk}$ , the result follows.  $\square$

#### A.5.1 Proof of Thm. 4

Fixing a dataset  $\mathbf{x}_1, \dots, \mathbf{x}_m$  and applying Cauchy-Schwartz, the Rademacher complexity is

$$\mathbb{E}_\epsilon \sup_{\mathbf{u}, W} \frac{1}{m} \sum_{i=1}^m \epsilon_i \mathbf{u}^\top \sigma(W \mathbf{x}_i) \leq \mathbb{E}_\epsilon \sup_W \frac{b}{m} \left\| \sum_{i=1}^m \epsilon_i \sigma(W \mathbf{x}_i) \right\|.$$

Recalling that  $\sigma(z) = \sum_{j=1}^\infty a_j z^j$ , by the triangle inequality, we have that the above is at most

$$\mathbb{E}_\epsilon \sup_W \frac{b}{m} \sum_{j=1}^\infty |a_j| \left\| \sum_{i=1}^m \epsilon_i (W \mathbf{x}_i)^j \right\| \leq \frac{b}{m} \sum_{j=1}^\infty |a_j| \mathbb{E}_\epsilon \sup_W \left\| \sum_{i=1}^m \epsilon_i (W \mathbf{x}_i)^j \right\|$$

where  $(\cdot)^j$  is applied element-wise. Recalling that the supremum is over matrices of spectral norm at most  $B$ , and using Jensen's inequality, the above can be equivalently written as

$$\frac{b}{m} \sum_{j=1}^\infty |a_j| B^j \cdot \mathbb{E}_\epsilon \sup_{W: \|W\| \leq 1} \left\| \sum_{i=1}^m \epsilon_i (W \mathbf{x}_i)^j \right\| \leq \frac{b}{m} \sum_{j=1}^\infty |a_j| B^j \sqrt{\mathbb{E}_\epsilon \sup_{W: \|W\| \leq 1} \left\| \sum_{i=1}^m \epsilon_i (W \mathbf{x}_i)^j \right\|^2}. \quad (15)$$

Using Lemma 4, we have that for any  $W : \|W\| \leq 1$ ,

$$\left\| \sum_{i=1}^m \epsilon_i (W \mathbf{x}_i)^j \right\|^2 = \sum_\ell \left( \sum_i \epsilon_i (W \mathbf{x}_i)_\ell^j \right)^2 \leq \sum_{\ell_1, \dots, \ell_j=1}^d \left( \sum_{i=1}^m \epsilon_i x_{i, \ell_1} \cdots x_{i, \ell_j} \right)^2.$$

Thus,

$$\begin{aligned} \mathbb{E}_\epsilon \sup_{W: \|W\| \leq 1} \left\| \sum_{i=1}^m \epsilon_i (W \mathbf{x}_i)^j \right\|^2 &\leq \mathbb{E}_\epsilon \sum_{\ell_1, \dots, \ell_j=1}^d \left( \sum_{i=1}^m \epsilon_i x_{i, \ell_1} \cdots x_{i, \ell_j} \right)^2 \\ &= \mathbb{E}_\epsilon \sum_{i, i'=1}^m \sum_{\ell_1, \dots, \ell_j=1}^d \epsilon_i \epsilon_{i'} x_{i, \ell_1} x_{i', \ell_1} \cdots x_{i, \ell_j} x_{i', \ell_j} \\ &\stackrel{(*)}{=} \sum_{i=1}^m \sum_{\ell_1, \dots, \ell_j=1}^d x_{i, \ell_1}^2 \cdots x_{i, \ell_j}^2 \\ &= \sum_{i=1}^m \left( \sum_{\ell_1=1}^d x_{i, \ell_1}^2 \right) \cdots \left( \sum_{\ell_j=1}^d x_{i, \ell_j}^2 \right) \\ &= \sum_{i=1}^m \|\mathbf{x}_i\|^{2j} \leq \sum_{i=1}^m b_x^{2j} = m \cdot b_x^{2j}, \end{aligned}$$

where in  $(*)$  we used the fact that each  $\epsilon_i$  is independent and uniformly distributed on  $\pm 1$ . Plugging this bound back into Eq. (15), we get that the Rademacher complexity is at most

$$\frac{b}{m} \sum_{j=1}^\infty |a_j| (B b_x)^j \sqrt{m} = \frac{b \cdot \tilde{\sigma}(B b_x)}{\sqrt{m}}.$$

Upper bounding this by  $\epsilon$  and solving for  $m$ , the result follows.

## A.6 Proof of Example 2

$\sigma(z) = \operatorname{erf}(rz) = \frac{2}{\sqrt{\pi}} \int_{t=0}^{rz} \exp(-t^2) dt = \frac{2}{\sqrt{\pi}} \int_{t=0}^{rz} \sum_{j=0}^{\infty} \frac{(-t^2)^j}{j!} dt = \frac{2}{\sqrt{\pi}} \sum_{j=0}^{\infty} \frac{(-1)^j (rz)^{2j+1}}{j!(2j+1)}$ , and therefore  $\tilde{\sigma}(z) = \frac{2}{\sqrt{\pi}} \sum_{j=0}^{\infty} \frac{(rz)^{2j+1}}{j!(2j+1)} \leq \frac{2rz}{\sqrt{\pi}} \sum_{j=0}^{\infty} \frac{((rz)^2)^j}{j!} = \frac{2rz}{\sqrt{\pi}} \exp((rz)^2)$ .

## A.7 Proof of Example 3

By a computation similar to the previous example,  $\sigma(y) = \frac{1}{2}y + \frac{1}{\sqrt{\pi}} \sum_{j=0}^{\infty} \frac{(-1)^j (r^{2j+1} y^{2j+2})}{j!(2j+1)(2j+2)}$ , and therefore  $\tilde{\sigma}(z) = \frac{z}{2} + \frac{1}{\sqrt{\pi}} \sum_{j=0}^{\infty} \frac{r^{2j+1} z^{2j+2}}{j!(2j+1)(2j+2)} \leq \frac{z}{2} + \frac{rz^2}{\sqrt{\pi}} \sum_{j=0}^{\infty} \frac{((rz)^2)^j}{j!} = \frac{z}{2} + \frac{rz^2}{\sqrt{\pi}} \exp((rz)^2)$ .

## A.8 Proof of Thm. 5

For simplicity, we use  $\sup_{\mathbf{u}, W^1, \dots, W^L}$  as short for  $\sup_{\mathbf{u}: \|\mathbf{u}\| \leq b, W^1, \dots, W^L: \max_j \|W^j\| \leq B}$ . The Rademacher complexity equals

$$\begin{aligned} \mathbb{E}_{\epsilon} \sup_{\mathbf{u}, W^1, \dots, W^L} \frac{1}{m} \sum_{i=1}^m \epsilon_i f_{L+1}(\mathbf{x}_i) &= \mathbb{E}_{\epsilon} \sup_{\mathbf{u}, W^1, \dots, W^L} \frac{1}{m} \sum_{i=1}^m \epsilon_i \mathbf{u}^\top f_L(\mathbf{x}_i) \\ &\leq \mathbb{E}_{\epsilon} \sup_{\mathbf{u}, W^1, \dots, W^L} \mathbf{u}^\top \left( \frac{1}{m} \sum_{i=1}^m \epsilon_i f_L(\mathbf{x}_i) \right) \leq \frac{b}{m} \cdot \mathbb{E}_{\epsilon} \sup_{\mathbf{u}, W^1, \dots, W^L} \left\| \sum_{i=1}^m \epsilon_i f_L(\mathbf{x}_i) \right\| \\ &\leq \frac{b}{m} \sqrt{\mathbb{E}_{\epsilon} \sup_{\mathbf{u}, W^1, \dots, W^L} \left\| \sum_{i=1}^m \epsilon_i f_L(\mathbf{x}_i) \right\|^2} = \frac{b}{m} \sqrt{\mathbb{E}_{\epsilon} \sup_{\mathbf{u}, W^1, \dots, W^L} \sum_{\ell} \left( \sum_{i=1}^m \epsilon_i (f_L(\mathbf{x}_i))_{\ell} \right)^2}, \quad (16) \end{aligned}$$

where we used Cauchy-Schwartz and the assumption  $\|\mathbf{u}\| \leq b$ , and  $\ell$  ranges over the indices of  $f_L(\mathbf{x}_i)$ . Recalling that  $f_{j+1}(\mathbf{x}) = (W^{j+1} f_j(\mathbf{x}))^{\circ k}$  and repeatedly applying Lemma 4, we have

$$\begin{aligned} \sum_{\ell} \left( \sum_{i=1}^m \epsilon_i (f_L(\mathbf{x}_i))_{\ell} \right)^2 &\leq \sum_{\ell} B^{2k} \sum_{\ell_1 \dots \ell_k} \left( \sum_{i=1}^m \epsilon_i (f_{L-1}(\mathbf{x}_i))_{\ell_1} \cdots (f_{L-1}(\mathbf{x}_i))_{\ell_k} \right)^2 \\ &\leq B^{2k+2k^2} \sum_{\ell_1 \dots \ell_{k^2}} \left( \sum_{i=1}^m \epsilon_i (f_{L-2}(\mathbf{x}_i))_{\ell_1} \cdots (f_{L-2}(\mathbf{x}_i))_{\ell_{k^2}} \right)^2 \\ &\leq \dots \leq B^{2k+2k^2+\dots+2k^L} \sum_{\ell_1 \dots \ell_{k^L}} \left( \sum_{i=1}^m \epsilon_i (f_0(\mathbf{x}_i))_{\ell_1} \cdots (f_0(\mathbf{x}_i))_{\ell_{k^L}} \right)^2 \\ &= B^{2k+2k^2+\dots+2k^L} \sum_{\ell_1 \dots \ell_{k^L}} \left( \sum_{i=1}^m \epsilon_i (f_0(\mathbf{x}_i))_{\ell_1} \cdots (f_0(\mathbf{x}_i))_{\ell_{k^L}} \right)^2 \\ &= B^{2k+2k^2+\dots+2k^L} \sum_{\ell_1 \dots \ell_{k^L}} \left( \sum_{i=1}^m \epsilon_i x_{i, \ell_1} \cdots x_{i, \ell_{k^L}} \right)^2 \end{aligned}$$

Therefore, recalling that  $\epsilon_1 \dots \epsilon_m$  are i.i.d. and uniform on  $\{-1, +1\}$ , we have

$$\begin{aligned}
\mathbb{E}_\epsilon \sup_{\mathbf{u}, W^0, \dots, W^{L-1}} \sum_{\ell} \left( \sum_{i=1}^m \epsilon_i (f_L(\mathbf{x}_i))_{\ell} \right)^2 &\leq B^{2k+2k^2+\dots+2k^L} \mathbb{E}_\epsilon \sum_{\ell_1 \dots \ell_{kL}} \left( \sum_{i=1}^m \epsilon_i x_{i, \ell_1} \cdots x_{i, \ell_{kL}} \right)^2 \\
&= B^{2k+2k^2+\dots+2k^L} \mathbb{E}_\epsilon \sum_{\ell_1 \dots \ell_{kL}} \sum_{i, i'=1}^m \epsilon_i \epsilon_{i'} x_{i, \ell_1} x_{i', \ell_1} \cdots x_{i, \ell_{kL}} x_{i', \ell_{kL}} \\
&= B^{2k+2k^2+\dots+2k^L} \sum_{\ell_1 \dots \ell_{kL}} \sum_{i=1}^m x_{i, \ell_1}^2 \cdots x_{i, \ell_{kL}}^2 \\
&= B^{2k+2k^2+\dots+2k^L} \sum_{i=1}^m \left( \sum_{\ell_1} x_{i, \ell_1}^2 \right) \cdots \left( \sum_{\ell_{kL}} x_{i, \ell_{kL}}^2 \right) \leq B^{2k+2k^2+\dots+2k^L} \cdot m \cdot b_x^{2k^L},
\end{aligned}$$

where in the last step we used the assumption that  $\|\mathbf{x}_i\|^2 \leq b_x^2$  for all  $i$ . Plugging this back into Eq. (16), and solving for the number of inputs  $m$  required to make the expression less than  $\epsilon$ , the result follows.

## A.9 Proof of Thm. 6

We will need the following lemma, based on a contraction result from Ledoux and Talagrand [1991]:

**Lemma 5.** *Let  $\mathcal{T}$  be a set of vectors in  $\mathbb{R}^m$  which contains the origin. If  $\epsilon_1, \dots, \epsilon_m$  are i.i.d. Rademacher random variables, and  $\sigma$  is an  $L$ -Lipschitz function on  $\mathbb{R}$  with  $\sigma(0) = 0$ , then*

$$\mathbb{E}_\epsilon \left[ \sup_{t \in \mathcal{T}} \left( \sum_{i=1}^m \epsilon_i \sigma(t_i) \right)^2 \right] \leq 2L^2 \cdot \mathbb{E}_\epsilon \left[ \left( \sup_{t \in \mathcal{T}} \sum_{i=1}^m \epsilon_i t_i \right)^2 \right].$$

*Proof.* For any realization of  $\epsilon$ ,  $\sup_{t \in \mathcal{T}} \left| \sum_{i=1}^m \epsilon_i \sigma(t_i) \right|$  equals either  $\sup_{t \in \mathcal{T}} \sum_{i=1}^m \epsilon_i \sigma(t_i)$  or  $\sup_{t \in \mathcal{T}} - \sum_{i=1}^m \epsilon_i \sigma(t_i)$ . Thus, the left hand side in the lemma can be upper bounded as follows:

$$\mathbb{E} \left[ \left( \sup_{t \in \mathcal{T}} \left| \sum_{i=1}^m \epsilon_i \sigma(t_i) \right| \right)^2 \right] \leq \mathbb{E} \left[ \left( \sup_{t \in \mathcal{T}} \sum_{i=1}^m \epsilon_i \sigma(t_i) \right)^2 + \left( \sup_{t \in \mathcal{T}} - \sum_{i=1}^m \epsilon_i \sigma(t_i) \right)^2 \right].$$

Noting that  $\mathbb{E}_\epsilon [(\sup_{t \in \mathcal{T}} \sum_i \epsilon_i \sigma(t_i))^2]$  equals  $\mathbb{E}_\epsilon [(\sup_{t \in \mathcal{T}} - \sum_i \epsilon_i \sigma(t_i))^2]$  by symmetry of the  $\epsilon_i$  random variables, the expression above equals

$$2 \cdot \mathbb{E} \left[ \left( \sup_{t \in \mathcal{T}} \sum_{i=1}^m \epsilon_i \sigma(t_i) \right)^2 \right] \stackrel{(*)}{=} 2 \cdot \mathbb{E} \left[ \left[ \sup_{t \in \mathcal{T}} \sum_{i=1}^m \epsilon_i \sigma(t_i) \right]_+^2 \right] = 2L^2 \cdot \mathbb{E} \left[ \left[ \sup_{t \in \mathcal{T}} \sum_{i=1}^m \epsilon_i \frac{1}{L} \sigma(t_i) \right]_+^2 \right],$$

where  $(*)$  follows from the fact that the supremum is always non-negative, since  $\sigma(0) = 0$  and  $\mathcal{T}$  contains the origin. We now utilize equation (4.20) in Ledoux and Talagrand [1991], which implies that  $\mathbb{E}_\epsilon g(\sup_{t \in \mathcal{T}} \sum_i \epsilon_i \phi(t_i)) \leq \mathbb{E}_\epsilon g(\sup_{t \in \mathcal{T}} \sum_i \epsilon_i t_i)$  for any 1-Lipschitz  $\phi$  satisfying  $\phi(0) = 0$ , and any convex increasing function  $g$ . Plugging into the above, and using the fact that  $[z]_+^2 \leq z^2$  for all  $z$ , the lemma follows.  $\square$

We now turn to prove the theorem. The Rademacher complexity times  $m$  equals

$$\mathbb{E}_\epsilon \left[ \sup_{W, \mathbf{u}} \sum_{i=1}^m \epsilon_i \mathbf{u}^\top \sigma(W \mathbf{x}_i) \right],$$

where for notational convenience we drop the conditions on  $W, \mathbf{u}, \mathbf{w}$  in the supremum. Using the Cauchy-Schwartz and Jensen's inequalities, this in turn can be upper bounded as follows:

$$\begin{aligned}
\mathbb{E}_\epsilon \left[ \sup_{W, \mathbf{u}} \mathbf{u}^\top \left( \sum_{i=1}^m \epsilon_i \sigma(W \mathbf{x}_i) \right) \right] &\leq b \cdot \mathbb{E}_\epsilon \left[ \sup_W \left\| \sum_{i=1}^m \epsilon_i \sigma(W \mathbf{x}_i) \right\| \right] \\
&\leq b \sqrt{\mathbb{E}_\epsilon \left[ \sup_W \left\| \sum_{i=1}^m \epsilon_i \sigma(W \mathbf{x}_i) \right\|^2 \right]} = b \sqrt{\mathbb{E}_\epsilon \left[ \sup_W \sum_{j=1}^n \left( \sum_{i=1}^m \epsilon_i \sigma(\mathbf{w}^\top \phi_j(\mathbf{x}_i)) \right)^2 \right]} \\
&\leq b \sqrt{\sum_{j=1}^n \mathbb{E}_\epsilon \left[ \sup_W \left( \sum_{i=1}^m \epsilon_i \sigma(\mathbf{w}^\top \phi_j(\mathbf{x}_i)) \right)^2 \right]}.
\end{aligned}$$

Recall that the supremum is over all matrices  $W$  which conform to the patches, and has spectral norm at most  $B$ . By definition, every row of this matrix has a subset of entries, which correspond to the convolutional filter vector  $\mathbf{w}$ . Thus, we must have  $\|\mathbf{w}\| \leq B$ , since the norm  $\mathbf{w}$  equals the norm of any row of  $W$ , and the norm of a row of  $W$  is a lower bound on the spectral norm. Thus, we can upper bound the expression above by taking the supremum over *all* vectors  $\mathbf{w}$  such that  $\|\mathbf{w}\| \leq B$  (and not just those that the corresponding matrix has spectral norm  $\leq B$ ). Thus, we get the upper bound

$$b \sqrt{\sum_{j=1}^n \mathbb{E}_\epsilon \left[ \sup_{\mathbf{w}: \|\mathbf{w}\| \leq B} \left( \sum_{i=1}^m \epsilon_i \sigma(\mathbf{w}^\top \phi_j(\mathbf{x}_i)) \right)^2 \right]},$$

which by Lemma 5 and Cauchy-Shwartz, is at most

$$\begin{aligned}
bL \sqrt{2 \sum_{j=1}^n \mathbb{E}_\epsilon \left[ \sup_{\mathbf{w}: \|\mathbf{w}\| \leq B} \left( \sum_{i=1}^m \epsilon_i \mathbf{w}^\top \phi_j(\mathbf{x}_i) \right)^2 \right]} &\leq bBL \sqrt{2 \sum_{j=1}^n \mathbb{E}_\epsilon \left[ \left\| \sum_{i=1}^m \epsilon_i \phi_j(\mathbf{x}_i) \right\|^2 \right]} \\
&= bBL \sqrt{2 \sum_{j=1}^n \mathbb{E}_\epsilon \left[ \sum_{i, i'=1}^m \epsilon_i \epsilon_{i'} \phi_j(\mathbf{x}_i)^\top \phi_j(\mathbf{x}_{i'}) \right]} = bBL \sqrt{2 \sum_{j=1}^n \sum_{i=1}^m \|\phi_j(\mathbf{x}_i)\|^2}.
\end{aligned}$$

Recalling that  $O_\Phi$  is the maximal number of times any single input coordinate appears across the patches, and letting  $x_{i,l}$  be the  $l$ -th coordinate of  $\mathbf{x}_i$ , we can upper bound the above by

$$bBL \sqrt{2 \sum_{i=1}^m \sum_{l=1}^d x_{i,l}^2 O_\Phi} = bBL \sqrt{2 \sum_{i=1}^m \|\mathbf{x}_i\|^2 \cdot O_\Phi} \leq bBb_x L \sqrt{2mO_\Phi}.$$

Dividing by  $m$ , and solving for the number  $m$  required to make the resulting expression less than  $\epsilon$ , the result follows.

## A.10 Proof of Thm. 7

The proof follows from a covering number argument. We start with some required definitions and lemmas.

**Definition 2.** Let  $\mathcal{F}$  be a class of functions from  $\mathcal{X}$  to  $\mathbb{R}$ . For  $1 \leq p \leq \infty$ ,  $\epsilon > 0$ , and  $\{\mathbf{x}_1, \dots, \mathbf{x}_m\} \subseteq \mathcal{X}$ , the empirical covering number  $\mathcal{N}_p(\mathcal{F}, \epsilon; \mathbf{x}_1, \dots, \mathbf{x}_m)$  is the minimal cardinality of a set  $V \subseteq \mathbb{R}^m$ , such that for all  $f \in \mathcal{F}$  there is  $\mathbf{v} \in V$  such that

$$\left( \frac{1}{m} \sum_{i=1}^m |f(\mathbf{x}_i) - v_i|^p \right)^{1/p} \leq \epsilon.$$

We define the covering number  $\mathcal{N}_p(\mathcal{F}, \epsilon, m) = \sup_{\mathbf{x}_1, \dots, \mathbf{x}_m} \mathcal{N}_p(\mathcal{F}, \epsilon; \mathbf{x}_1, \dots, \mathbf{x}_m)$ .

**Lemma 6** (Zhang [2002]). *Let  $a, b > 0$ , let  $\mathcal{X} = \{\mathbf{x} \in \mathbb{R}^d : \|\mathbf{x}\| \leq b\}$ , and consider the class of linear predictors  $\mathcal{F} = \{f \in \mathbb{R}^{\mathcal{X}} : f(\mathbf{x}) = \mathbf{w}^\top \mathbf{x}, \|\mathbf{w}\| \leq a\}$ . Then,*

$$\log \mathcal{N}_\infty(\mathcal{F}, \epsilon, m) \leq \frac{36a^2b^2}{\epsilon^2} \log(2m[4ab/\epsilon + 2] + 1) .$$

**Lemma 7** (E.g., Daniely and Granot [2019]). *Let  $C > 0$  and let  $\mathcal{F}$  be a class of  $C$ -bounded functions from  $\mathcal{X}$  to  $\mathbb{R}$ , i.e.,  $|f(\mathbf{x})| \leq C$  for all  $f \in \mathcal{F}$  and  $\mathbf{x} \in \mathcal{X}$ . Then, for every integer  $M \geq 1$  we have*

$$\mathcal{R}_m(\mathcal{F}) \leq C2^{-M} + \frac{6C}{\sqrt{m}} \sum_{k=1}^M 2^{-k} \sqrt{\log \mathcal{N}_2(\mathcal{F}, C2^{-k}, m)} .$$

We are now ready to prove the theorem. For  $i \in [m]$ ,  $j \in [n]$  we denote  $\mathbf{x}'_{i,j} = \phi_j(\mathbf{x}_i) \in \mathbb{R}^{n'}$ . Let  $\mathcal{X}_{n'} = \{\mathbf{x}' \in \mathbb{R}^{n'} : \|\mathbf{x}'\| \leq b_x\}$ , and let

$$\mathcal{F} := \{f \in \mathbb{R}^{\mathcal{X}_{n'}} : f(\mathbf{x}') = \mathbf{w}^\top \mathbf{x}', \mathbf{w} \in \mathbb{R}^{n'}, \|\mathbf{w}\| \leq B\} .$$

Let  $V \subseteq \mathbb{R}^{mn}$  be a set of size at most  $\mathcal{N}_\infty(\mathcal{F}, \epsilon/L, mn)$ , such that for all  $f \in \mathcal{F}$  there is  $\mathbf{v} \in V$  that satisfies the following: Letting  $v_{i,j} := v_{(i-1)n+j}$ , we have  $|f(\mathbf{x}'_{i,j}) - v_{i,j}| \leq \epsilon/L$  for all  $i \in [m]$ ,  $j \in [n]$ .

We define

$$U := \{\mathbf{u} \in \mathbb{R}^m : \text{there is } \mathbf{v} \in V \text{ s.t. } u_i = \rho \circ \sigma(v_{i,1}, \dots, v_{i,n}) = \rho(\sigma(v_{i,1}), \dots, \sigma(v_{i,n})) \text{ for all } i \in [m]\} .$$

Note that  $|U| \leq |V|$ . Let  $h \in \mathcal{H}_{B,n,d}^{\sigma,\rho,\Phi}$  and suppose that the network  $h$  has a filter  $\mathbf{w} \in \mathbb{R}^{n'}$ . Let  $W$  be the weight matrix that corresponds to  $\Phi$  and  $\mathbf{w}$ . Thus, we have  $\|W\| \leq B$ . Let  $\mathbf{x} \in \mathbb{R}^d$  such that  $\phi_1(\mathbf{x}) = \frac{\mathbf{w}}{\|\mathbf{w}\|}$  and  $x_k = 0$  for every coordinate  $k$  that does not appear in  $\phi_1$ . That is,  $\mathbf{x}$  is a vector of norm 1 such that  $(W\mathbf{x})_1 = \mathbf{w}^\top \phi_1(\mathbf{x}) = \|\mathbf{w}\|$ . Therefore,  $\|W\mathbf{x}\| \geq (W\mathbf{x})_1 = \|\mathbf{w}\|$ , and thus  $B \geq \|W\| \geq \|\mathbf{w}\|$ . Let  $f$  be the function in  $\mathcal{F}$  that corresponds to  $\mathbf{w}$ , and let  $\mathbf{v} \in V$  such that  $|f(\mathbf{x}'_{i,j}) - v_{i,j}| \leq \epsilon/L$  for all  $i \in [m]$ ,  $j \in [n]$ . Let  $\mathbf{u} \in U$  that corresponds to  $\mathbf{v}$ , namely,  $u_i = \rho \circ \sigma(v_{i,1}, \dots, v_{i,n})$  for all  $i \in [m]$ . Note that  $|h(\mathbf{x}_i) - u_i| \leq \epsilon$  for all  $i \in [m]$ . Indeed, we have that  $|h(\mathbf{x}_i) - u_i|$  equals

$$|\rho \circ \sigma(f(\mathbf{x}'_{i,1}), \dots, f(\mathbf{x}'_{i,n})) - \rho \circ \sigma(v_{i,1}, \dots, v_{i,n})| \leq L \cdot \max_{j \in [n]} |f(\mathbf{x}'_{i,j}) - v_{i,j}| \leq L \cdot \frac{\epsilon}{L} = \epsilon ,$$

where the first inequality follows from the  $L$ -Lipschitzness of  $\rho \circ \sigma$  w.r.t.  $\ell_\infty$ . Hence,

$$\mathcal{N}_\infty(\mathcal{H}_{B,n,d}^{\sigma,\rho,\Phi}, \epsilon, m) \leq |U| \leq |V| \leq \mathcal{N}_\infty(\mathcal{F}, \epsilon/L, mn) .$$

Combining the above with Lemma 6, and using the fact that the  $\mathcal{N}_2$  covering number is at most the  $\mathcal{N}_\infty$  covering number (cf. Anthony and Bartlett [1999]), we get

$$\begin{aligned} \log \mathcal{N}_2(\mathcal{H}_{B,n,d}^{\sigma,\rho,\Phi}, \epsilon, m) &\leq \log \mathcal{N}_\infty(\mathcal{H}_{B,n,d}^{\sigma,\rho,\Phi}, \epsilon, m) \\ &\leq \log \mathcal{N}_\infty(\mathcal{F}, \epsilon/L, mn) \\ &\leq \frac{36b_x^2 B^2}{(\epsilon/L)^2} \log(2mn[4b_x B/(\epsilon/L) + 2] + 1) . \end{aligned} \quad (17)$$

Note that for every  $\mathbf{x} \in \mathcal{X} := \{\mathbf{x} \in \mathbb{R}^d : \|\phi_j(\mathbf{x})\| \leq b_x \text{ for all } j \in [n]\}$  and  $h \in \mathcal{H}_{B,n,d}^{\sigma,\rho,\Phi}$  we have  $|h(\mathbf{x})| = |\rho(\sigma(\mathbf{w}^\top \phi_1(\mathbf{x})), \dots, \sigma(\mathbf{w}^\top \phi_n(\mathbf{x})))| \leq Lb_x B$ , since  $|\mathbf{w}^\top \phi_j(\mathbf{x})| \leq Bb_x$ , the activation  $\sigma$  is  $L$ -Lipschitz and satisfies  $\sigma(0) = 0$ , and  $\rho$  is 1-Lipschitz w.r.t.  $\ell_\infty$  and satisfies  $\rho(\mathbf{0}) = 0$ . By Lemma 7, we conclude that

$$\mathcal{R}_m(\mathcal{H}_{B,n,d}^{\sigma,\rho,\Phi}) \leq Lb_x B 2^{-M} + \frac{6Lb_x B}{\sqrt{m}} \sum_{\ell=1}^M 2^{-\ell} \sqrt{\log \mathcal{N}_2(\mathcal{H}_{B,n,d}^{\sigma,\rho,\Phi}, Lb_x B 2^{-\ell}, m)} ,$$

for every integer  $M \geq 1$ . By plugging-in  $M = \lceil \log(\sqrt{m}) \rceil$  and the expression from Eq. (17), we get

$$\begin{aligned} \mathcal{R}_m \left( \mathcal{H}_{B,n,d}^{\sigma,\rho,\Phi} \right) &\leq \frac{Lb_x B}{\sqrt{m}} + \frac{6Lb_x B}{\sqrt{m}} \sum_{\ell=1}^{\lceil \log(\sqrt{m}) \rceil} 2^{-\ell} \sqrt{\frac{36b_x^2 B^2}{(b_x B 2^{-\ell})^2} \log(2mn \lceil 4b_x B / (b_x B 2^{-\ell}) + 2 \rceil + 1)} \\ &= \frac{Lb_x B}{\sqrt{m}} + \frac{36Lb_x B}{\sqrt{m}} \sum_{\ell=1}^{\lceil \log(\sqrt{m}) \rceil} \sqrt{\log(2mn \lceil 4 \cdot 2^\ell + 2 \rceil + 1)} \\ &\leq \frac{Lb_x B}{\sqrt{m}} + \frac{36Lb_x B}{\sqrt{m}} \lceil \log(\sqrt{m}) \rceil \cdot \sqrt{\log(23mn\sqrt{m})}. \end{aligned}$$

Hence, for some universal constant  $c' > 0$  the above is at most

$$c' \cdot \frac{Lb_x B \log(m) \sqrt{\log(mn)}}{\sqrt{m}}.$$

Requiring this to be at most  $\epsilon$  and rearranging, the result follows.

### A.11 Proof of Thm. 8

To help the reader track the main proof ideas, we first prove the claim for the case where  $B = b_x = 1$  and  $\epsilon = 1/2$  (in Subsection A.11.1), and then extend the proof for arbitrary  $B, b_x, \epsilon > 0$  in Subsection A.11.2.

#### A.11.1 Proof for $B = b_x = 1$ and $\epsilon = 1/2$

Let  $m = \log(n)$  and let  $d = 3^m$ . Consider  $m$  points  $\mathbf{x}^1, \dots, \mathbf{x}^m$ , where for every  $i \in [m]$  the point  $\mathbf{x}^i \in \mathbb{R}^d$  is a vectorization of an order- $m$  tensor  $\hat{\mathbf{x}}^i$  such that each component is indexed by  $(j_1, \dots, j_m) \in [3]^m$ . We define the components  $x_{j_1, \dots, j_m}^i$  of  $\hat{\mathbf{x}}^i$  such that  $x_{j_1, \dots, j_m}^i = 1$  if  $j_i = 3$ , and  $j_r = 2$  for all  $r \neq i$ , and  $x_{j_1, \dots, j_m}^i = 0$  otherwise. Note that  $\|\mathbf{x}^i\| = 1$  for all  $i \in [m]$ . Consider patches of dimensions  $2 \times \dots \times 2$  and stride 1. Thus, the set  $\Phi$  corresponds to all the patches of dimensions  $2 \times \dots \times 2$  in the tensor. Note that there are  $2^m = n$  such patches. Indeed, given an index  $(j_1, \dots, j_m) \in [2]^m$ , we can define a patch which contains the indices  $\{(j_1, \dots, j_m) + (\Delta_1, \dots, \Delta_m) : (\Delta_1, \dots, \Delta_m) \in \{0, 1\}^m\}$ . We say that  $(j_1, \dots, j_m)$  is the *base index* of this patch. Note that each  $(j_1, \dots, j_m) \in [2]^m$  is a base index of exactly one patch. Also, an index  $(j_1, \dots, j_m)$  which includes some  $r \in [m]$  with  $j_r = 3$  does not induce a patch of the form  $\{(j_1, \dots, j_m) + (\Delta_1, \dots, \Delta_m) : (\Delta_1, \dots, \Delta_m) \in \{0, 1\}^m\}$ , since for  $\Delta_r = 1$  we get an invalid index.

We show that for any  $\mathbf{y} \in \{0, 1\}^m$  we can find a filter  $\mathbf{w}$ , such that  $\mathbf{w}$  is an order- $m$  tensor of dimensions  $2 \times \dots \times 2$  and satisfies the following. Let  $N_{\mathbf{w}}$  be the neural network that consists of a convolutional layer with the patches  $\Phi$  and the filter  $\mathbf{w}$ , followed by a max-pooling layer. Then,  $N_{\mathbf{w}}(\mathbf{x}^i) = y_i$  for all  $i \in [m]$ . Thus, we can shatter  $\mathbf{x}^1, \dots, \mathbf{x}^m$  with margin  $\epsilon = 1/2$ . Moreover, the spectral norm of the matrix  $W$  that corresponds to the convolutional layer is at most 1.

Consider the filter  $\mathbf{w}$  of dimensions  $2 \times \dots \times 2$  such that  $w_{j_1, \dots, j_m} = 1$  if  $(j_1, \dots, j_m) = \mathbf{1} + \mathbf{y}$ , and  $w_{j_1, \dots, j_m} = 0$  otherwise. We now show that  $N_{\mathbf{w}}(\mathbf{x}^i) = y_i$  for all  $i \in [m]$ . Since the filter  $\mathbf{w}$  has a single non-zero component, then the inner product between  $\mathbf{w}$  and a patch of  $\mathbf{x}^i$  is non-zero iff the patch of  $\mathbf{x}^i$  has a non-zero component in the appropriate position. More precisely, for a patch with base index  $(j_1, \dots, j_m)$ , the inner product between the components of  $\mathbf{x}^i$  in the indices of the patch and the filter  $\mathbf{w}$  is 1 iff  $x_{(j_1, \dots, j_m) + \mathbf{y}}^i = 1$ , and otherwise the inner product is 0. Since  $x_{q_1, \dots, q_m}^i = 1$  iff  $q_i = 3$  and  $q_r = 2$  for  $r \neq i$ , then  $x_{(j_1, \dots, j_m) + \mathbf{y}}^i = 1$  iff  $j_i = 3 - y_i$  and  $j_r = 2 - y_r$  for  $r \neq i$ . Now, if  $y_i = 0$  then there is no patch such that the base index satisfies  $j_i = 3 - y_i = 3$ , since all base indices are in  $[2]^m$ , and therefore  $N_{\mathbf{w}}(\mathbf{x}^i) = 0$ . If  $y_i = 1$  then the patch whose base index satisfies  $j_i = 3 - y_i$  and  $j_r = 2 - y_r$  for  $r \neq i$  gives output 1 (and all other patches give output 0) and hence  $N_{\mathbf{w}}(\mathbf{x}^i) = 1$ . Thus, we have  $N_{\mathbf{w}}(\mathbf{x}^i) = y_i$  as required.

For example, consider the case where  $m = 2$ . Then, the tensor  $\hat{\mathbf{x}}^1$  is the matrix

$$\hat{\mathbf{x}}^1 = \begin{bmatrix} 0 & 0 & 0 \\ 0 & 0 & 0 \\ 0 & 1 & 0 \end{bmatrix}.$$

For  $\mathbf{y} = (1, 1)^\top$  we have  $\mathbf{w} = \begin{bmatrix} 0 & 0 \\ 0 & 1 \end{bmatrix}$  and hence the patch with base index  $(2, 1)$  gives output 1.

For  $\mathbf{y} = (1, 0)^\top$  we have  $\mathbf{w} = \begin{bmatrix} 0 & 0 \\ 1 & 0 \end{bmatrix}$  and hence the patch with base index  $(2, 2)$  gives output 1.

However, for  $\mathbf{y} = (0, 1)^\top$  we have  $\mathbf{w} = \begin{bmatrix} 0 & 1 \\ 0 & 0 \end{bmatrix}$  and hence there is no patch that gives output 1.

Thus, in all the above cases we have  $N_{\mathbf{w}}(\mathbf{x}^\top) = y_1$ .

It remains to show that the spectral norm of the matrix  $W$  that corresponds to the convolutional layer with the filter  $\mathbf{w}$  is at most 1. Thus, we show that for every input  $\mathbf{x} \in \mathbb{R}^d$  with  $\|\mathbf{x}\| = 1$  the inputs to the hidden layer is a vector with norm at most 1. We view  $\mathbf{x}$  as the vectorization of a tensor  $\hat{\mathbf{x}}$  with components  $x_{j_1, \dots, j_m}$  for  $(j_1, \dots, j_m) \in [3]^m$ . Since the filter  $\mathbf{w}$  contains a single 1-component and all other components are 0, then the input to each hidden neuron is a different component of  $\hat{\mathbf{x}}$ . More precisely, since the filter  $\mathbf{w}$  contains 1 at index  $\mathbf{1} + \mathbf{y}$  then for the patch with base index  $(j_1, \dots, j_m)$  the corresponding hidden neuron has input  $x_{(j_1, \dots, j_m) + \mathbf{y}}$ . Note that each hidden neuron corresponds to a different base index and hence the input to each hidden neuron is a different component of  $\hat{\mathbf{x}}$ . Therefore, the norm of the vector whose components are the inputs to the hidden neurons is at most the norm of the input  $\mathbf{x}$ , and hence it is at most 1.

### A.11.2 Proof for arbitrary $B, b_x, \epsilon > 0$

Let  $m = \left(\frac{b_x B}{2\epsilon}\right)^2 \cdot \log(n)$  and let  $d = \left(\frac{b_x B}{2\epsilon}\right)^2 \cdot 3^{\log(n)}$ . Let  $m' = \log(n)$  and let  $L = \left(\frac{b_x B}{2\epsilon}\right)^2$ . Consider  $m$  points  $\mathbf{x}^1, \dots, \mathbf{x}^m$ , where for every  $i \in [m]$  the point  $\mathbf{x}^i \in \mathbb{R}^d$  is a vectorization of a tensor  $\hat{\mathbf{x}}^i$  of order  $m' + 1$ , such that each component is indexed by  $(j_1, \dots, j_{m'}, \ell) \in [3]^{m'} \times [L]$ . Consider a partition of  $[m]$  into  $L$  disjoint subsets  $S_1, \dots, S_L$ , each of size  $m/L = m'$ .

We define the components  $x_{j_1, \dots, j_{m'}, \ell}^i$  of  $\hat{\mathbf{x}}^i$  as follows: Suppose that  $i \in S_r := \{k_1, \dots, k_{m'}\}$  for some  $r \in [L]$ , and that  $i = k_t$ , i.e.,  $i$  is the  $t$ -th element in the subset  $S_r$ . For every  $\ell \neq r$  we define  $x_{j_1, \dots, j_{m'}, \ell}^i = 0$  for every  $j_1, \dots, j_{m'} \in [3]^{m'}$ , namely, if  $\ell$  does not correspond to the subset of  $i$  then the component is 0. For  $\ell = r$  the component  $x_{j_1, \dots, j_{m'}, \ell}^i$  is defined in a similar way to the tensor  $\hat{\mathbf{x}}^i$  from Subsection A.11.1, but with respect to the subset  $S_r$  and at scale  $b_x$ . Formally, for  $\ell = r$  we have  $x_{j_1, \dots, j_{m'}, \ell}^i = b_x$  if  $j_t = 3$ , and  $j_k = 2$  for all  $k \neq t$ , and  $x_{j_1, \dots, j_{m'}, \ell}^i = 0$  otherwise. Note that  $\|\mathbf{x}^i\| = b_x$  for all  $i \in [m]$ .

Consider patches of dimensions  $2 \times \dots \times 2 \times L$  and stride 1. Thus, the set  $\Phi$  corresponds to all the patches of dimensions  $2 \times \dots \times 2 \times L$  in the tensor. Note that since the last dimension is  $L$ , then the filter can “move” only in the first  $m'$  dimensions. Also, note that there are  $2^{m'} = n$  such patches. Indeed, given  $(j_1, \dots, j_{m'}) \in [2]^{m'}$ , we can define a patch which contains the indices  $\left\{ (j_1, \dots, j_{m'}, 0) + (\Delta_1, \dots, \Delta_{m'}, \Delta_{m'+1}) : (\Delta_1, \dots, \Delta_{m'}) \in \{0, 1\}^{m'}, \Delta_{m'+1} \in [L] \right\}$ .

We say that  $(j_1, \dots, j_{m'})$  is the *base index* of this patch. Note that each  $(j_1, \dots, j_{m'}) \in [2]^{m'}$  is a base index of exactly one patch. Also, if  $(j_1, \dots, j_{m'})$  includes some  $r \in [m']$  with  $j_r = 3$  then it does not induce a patch of the form  $\left\{ (j_1, \dots, j_{m'}, 0) + (\Delta_1, \dots, \Delta_{m'}, \Delta_{m'+1}) : (\Delta_1, \dots, \Delta_{m'}) \in \{0, 1\}^{m'}, \Delta_{m'+1} \in [L] \right\}$ , since for  $\Delta_r = 1$  we get an invalid index.

We show that for any  $\mathbf{y} \in \{0, 1\}^m$  we can find a filter  $\mathbf{w}$ , such that  $\mathbf{w}$  is an order- $(m' + 1)$  tensor of dimensions  $2 \times \dots \times 2 \times L$  and satisfies the following. Let  $N_{\mathbf{w}}$  be the neural network that consists of a convolutional layer with the patches  $\Phi$  and the filter  $\mathbf{w}$ , followed by a max-pooling layer. Then, for all  $i \in [m]$  we have: if  $y_i = 0$  then  $N_{\mathbf{w}}(\mathbf{x}^i) = 0$ , and if  $y_i = 1$  then  $N_{\mathbf{w}}(\mathbf{x}^i) = 2\epsilon$ . Thus, we can shatter  $\mathbf{x}^1, \dots, \mathbf{x}^m$  with margin  $\epsilon$ . Moreover, the spectral norm of the matrix  $W$  that corresponds to the convolutional layer is at most  $B$ .

We now define the filter  $\mathbf{w}$  of dimensions  $2 \times \dots \times 2 \times L$ . For every  $\ell \in [L]$  we define the components  $w_{j_1, \dots, j_{m'}, \ell}$  as follows. Let  $\mathbf{y}_{S_\ell} \in \{0, 1\}^{m'}$  be the restriction of  $\mathbf{y}$  to the indices in  $S_\ell$ . Then,  $w_{j_1, \dots, j_{m'}, \ell} = \frac{2\epsilon}{b_x}$  if  $(j_1, \dots, j_{m'}) = \mathbf{1} + \mathbf{y}_{S_\ell}$ , and  $w_{j_1, \dots, j_{m'}, \ell} = 0$  otherwise. We show that for all  $i \in [m]$ , if  $y_i = 0$  then  $N_{\mathbf{w}}(\mathbf{x}^i) = 0$ , and if  $y_i = 1$  then  $N_{\mathbf{w}}(\mathbf{x}^i) = 2\epsilon$ . Suppose that  $i \in S_r := \{k_1, \dots, k_{m'}\}$  for some  $r \in [L]$ , and that  $i = k_t$ , i.e.,  $i$  is the  $t$ -th element in the

subset  $S_r$ . Then, the tensor  $\hat{\mathbf{x}}^i$  has a non-zero component only at  $x_{j_1, \dots, j_{m'}, r}^i$  with  $j_t = 3$ , and  $j_s = 2$  for all  $s \neq t$ . Moreover, the filter  $\mathbf{w}$  has a non-zero component at index  $(q_1, \dots, q_{m'}, r)$  iff  $(q_1, \dots, q_{m'}) = \mathbf{1} + \mathbf{y}_{S_r}$ . Hence, the inner product between  $\mathbf{w}$  and a patch of  $\mathbf{x}^i$  is non-zero iff the patch has a base index  $(j_1, \dots, j_{m'})$  such that  $(j_1, \dots, j_{m'}) + \mathbf{y}_{S_r} = (p_1, \dots, p_{m'})$  where  $p_t = 3$ , and  $p_s = 2$  for all  $s \neq t$ . If  $y_i = 0$  then the  $t$ -th component of  $\mathbf{y}_{S_r}$  is 0, and there is no patch such that the base index satisfies  $j_t + (\mathbf{y}_{S_r})_t = j_t + 0 = p_t = 3$ . Therefore,  $N_{\mathbf{w}}(\mathbf{x}^i) = 0$ . If  $y_i = 1$  then the patch whose base index satisfies  $j_t = 3 - (\mathbf{y}_{S_r})_t = 3 - 1 = 2$ , and  $j_s = 2 - (\mathbf{y}_{S_r})_s$  for  $s \neq t$ , gives output  $\frac{2\epsilon}{b_x} \cdot b_x = 2\epsilon$  (and all other patches give output 0).

It remains to show that the spectral norm of the matrix  $W$  that corresponds to the convolutional layer with the filter  $\mathbf{w}$  is at most  $B$ . Thus, we show that for every input  $\mathbf{x} \in \mathbb{R}^d$  with  $\|\mathbf{x}\| = 1$  the inputs to the hidden layer are a vector with norm at most  $B$ . We view  $\mathbf{x}$  as the vectorization of a tensor  $\hat{\mathbf{x}}$  with components  $x_{j_1, \dots, j_{m'}, \ell}$  for  $(j_1, \dots, j_{m'}, \ell) \in [3]^{m'} \times [L]$ . The inner product between a patch of  $\mathbf{x}$  and the filter  $\mathbf{w}$  can be written as

$$\sum_{\ell \in [L]} \frac{2\epsilon}{b_x} \cdot x_{q_1^{(\ell)}, \dots, q_{m'}^{(\ell)}, \ell}.$$

Thus, for each  $\ell$  there is a single index of  $\hat{\mathbf{x}}$  that contributes to the inner product, since for every  $\ell$  the filter  $\mathbf{w}$  has a single non-zero component, which equals  $\frac{2\epsilon}{b_x}$ . By Cauchy–Schwarz, the above sum is at most

$$\frac{2\epsilon}{b_x} \cdot \sqrt{L} \cdot \sqrt{\sum_{\ell \in [L]} x_{q_1^{(\ell)}, \dots, q_{m'}^{(\ell)}, \ell}^2} = \frac{2\epsilon}{b_x} \cdot \frac{b_x B}{2\epsilon} \cdot \sqrt{\sum_{\ell \in [L]} x_{q_1^{(\ell)}, \dots, q_{m'}^{(\ell)}, \ell}^2} = B \cdot \sqrt{\sum_{\ell \in [L]} x_{q_1^{(\ell)}, \dots, q_{m'}^{(\ell)}, \ell}^2}. \quad (18)$$

Hence, the input to the hidden neuron that corresponds to the patch is bounded by the above expression. Moreover, since for every  $\ell \in [L]$  the filter  $\mathbf{w}$  has a single non-zero component such that the last dimension of its index is  $\ell$ , then for every two patches with different base indices, the bound in the above expression includes different indices of  $\hat{\mathbf{x}}$ . Namely, if the inner product between one patch of  $\mathbf{x}$  and the filter  $\mathbf{w}$  is  $\sum_{\ell \in [L]} \frac{2\epsilon}{b_x} \cdot x_{q_1^{(\ell)}, \dots, q_{m'}^{(\ell)}, \ell}$  and the inner product between another patch of  $\mathbf{x}$  and the filter  $\mathbf{w}$  is  $\sum_{\ell \in [L]} \frac{2\epsilon}{b_x} \cdot x_{p_1^{(\ell)}, \dots, p_{m'}^{(\ell)}, \ell}$ , then for every  $\ell$  we have  $(q_1^{(\ell)}, \dots, q_{m'}^{(\ell)}) \neq (p_1^{(\ell)}, \dots, p_{m'}^{(\ell)})$ . Since by Eq. (18) the square of the input to each hidden neuron can be bounded by  $B^2 \cdot \sum_{\ell \in [L]} x_{q_1^{(\ell)}, \dots, q_{m'}^{(\ell)}, \ell}^2$  for some subset  $\left\{ x_{q_1^{(\ell)}, \dots, q_{m'}^{(\ell)}, \ell} \right\}_{\ell \in [L]}$  of components, and since for each two hidden neurons these subsets are disjoint, then the norm of the vector of inputs to the hidden neurons can be bounded by

$$\sqrt{B^2 \cdot \sum_{k \in [d]} x_k^2} \leq \sqrt{B^2 \cdot 1} = B.$$
